# Supplementary material for: The relationship between sternum variation and mode of locomotion in birds
Source: Springer Nature journal article supplement (doi:10.1186/s12915-021-01105-1), 2021-08-19
Supplement: 12915_2021_1105_MOESM1_ESM.pdf [file 12915_2021_1105_MOESM1_ESM.pdf]

**Additional File 1 for: Lowi-Merri et al. The relationship between sternum variation and mode of locomotion in birds in *BMC Biology***

**Supplementary Results**

***Shape Allometry using PC Scores***

PC axes were plotted against log cube root body mass to test for an allometric relationship between different sternum shape variables and body mass. PC1, defined by elongation of the sternum and lateral trabeculae, showed slight positive allometry with body mass (slope = 0.316,  $p = 0.000$ ) (Fig. S2). This indicates that square-shaped sterna with an incurved caudal edge and a low, anteriorly angled keel occur more in larger-sized birds, while smaller birds typically possess sterna with a taller keel and a rounded caudal edge. PC2, defined by narrowing and widening of the sternum, showed a slight negative allometric relationship with body mass (slope = -0.155,  $p = 0.000$ ). This indicates that larger birds tend to have more narrow sterna compared with smaller birds. PC3, defined by the height of the keel and shape of the caudal border, did not show a significant relationship with body mass (slope = 0.049,  $p = 0.1709$ ), nor did PC4, which is defined by the angle of the keel (slope = 0.0365,  $p = 0.231$ ). Therefore, keel height and angle are not correlated with body size, and these morphological features are likely influenced by some other ecological variable.

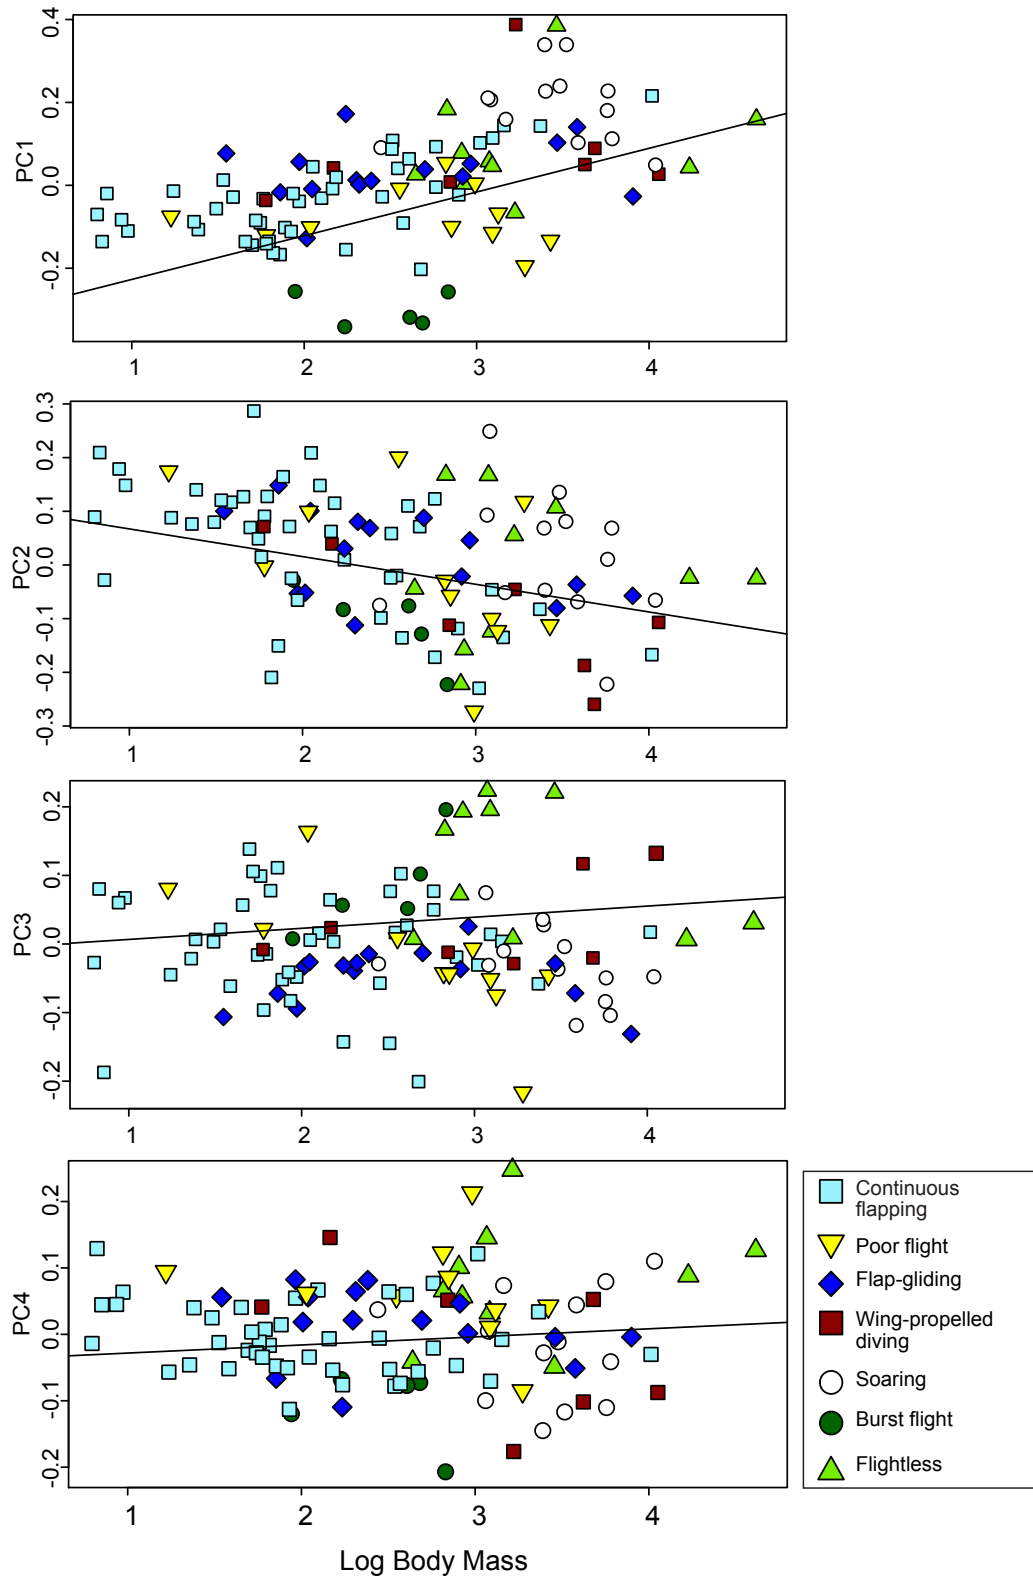

**Figure S1:** Regression plots for testing for allometry along the first 4 PC axes. Test statistics provided in Table S1.

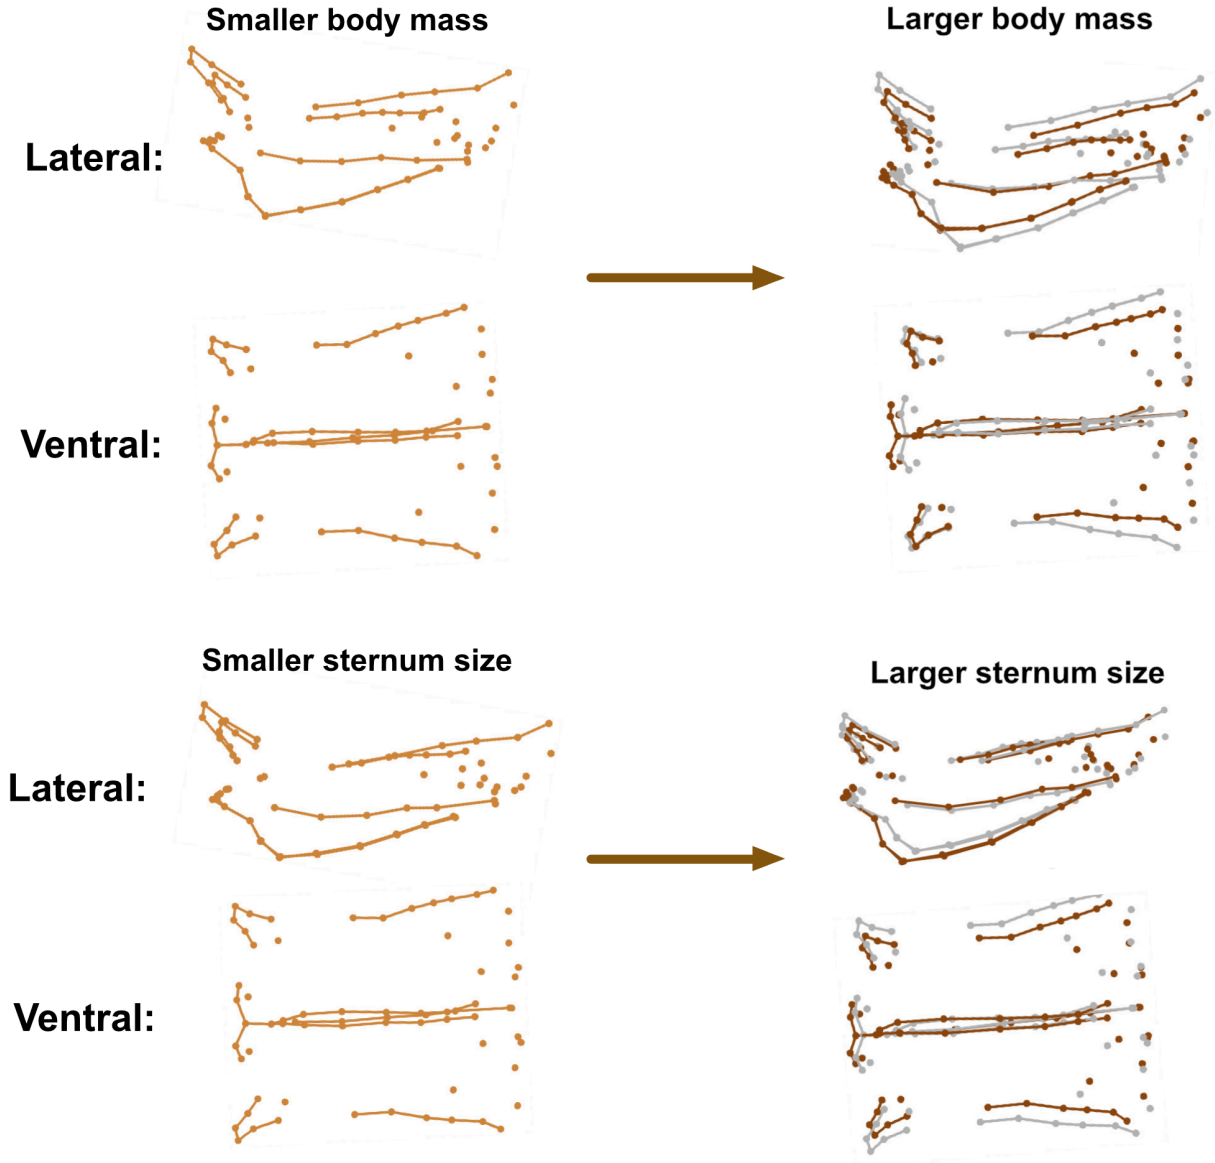

**Figure S2:** Sternal shape deformations showing the independent effect of sternum size and body size on sternum shape, showing smaller sizes in beige on the left and larger sizes in brown on the right. The grey shape overlain on the brown shape on the right (larger sternum size or body mass) represents the shape shown on the left side (smaller sternum size or body mass).

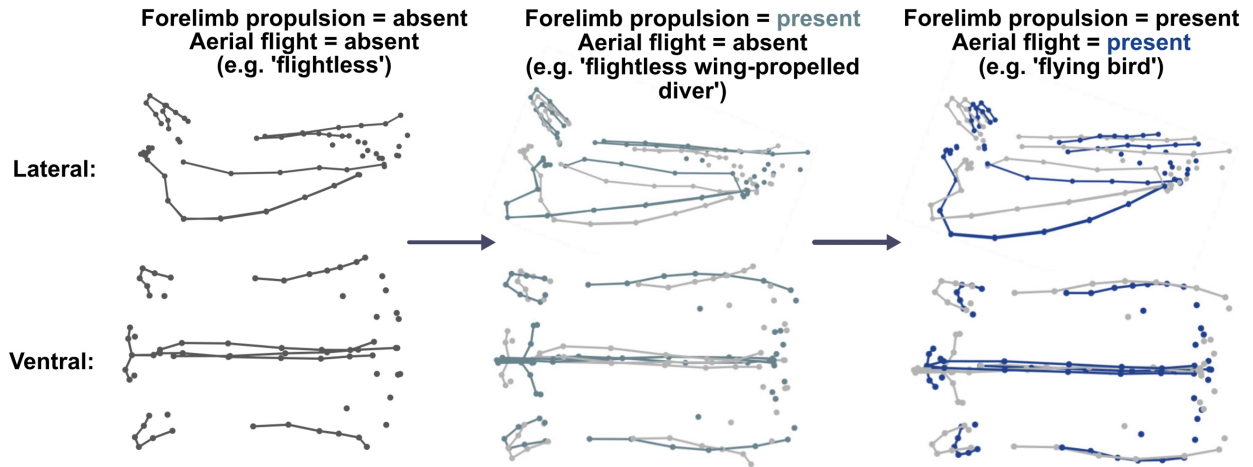

**Figure S3:** Shape deformations showing the independent effects of forelimb propulsion and aerial flight. The light grey shape overlain on top of the coloured shapes represents the coloured shape that occurred to the left in the series as a baseline for comparison. Forelimb propulsion is associated with a longer sternal body and lower, anteriorly projected keel; aerial flight is associated with a shorter sternal body and taller, rounded keel.

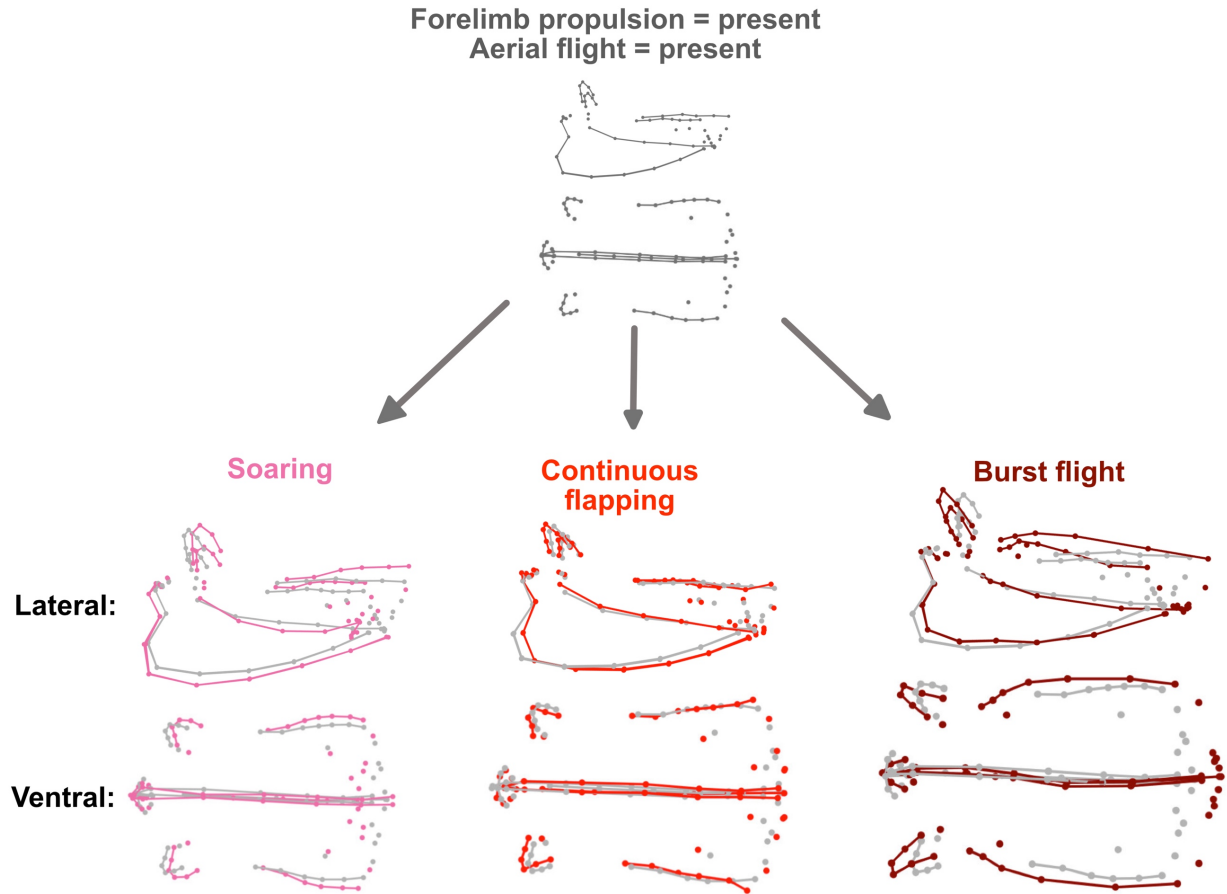

**Figure S4:** Shape deformations showing the independent effects of soaring flight, continuous flapping flight, and burst flight. The light grey shape overlain on top of the coloured shapes represents the shape shown at the top of the figure (showing the shape deformation for aerial flight) as a baseline for comparison.

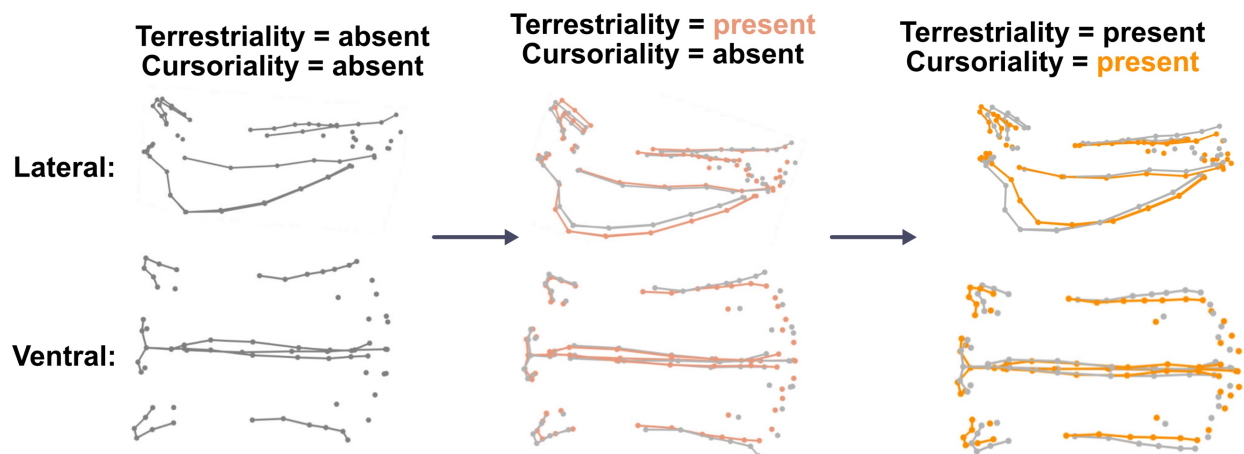

**Figure S5:** Shape deformations showing the independent effects of terrestriality and cursoriality. The light grey shape overlain on top of the coloured shapes represents the coloured shape occurring to the left in the series as a baseline for comparison.

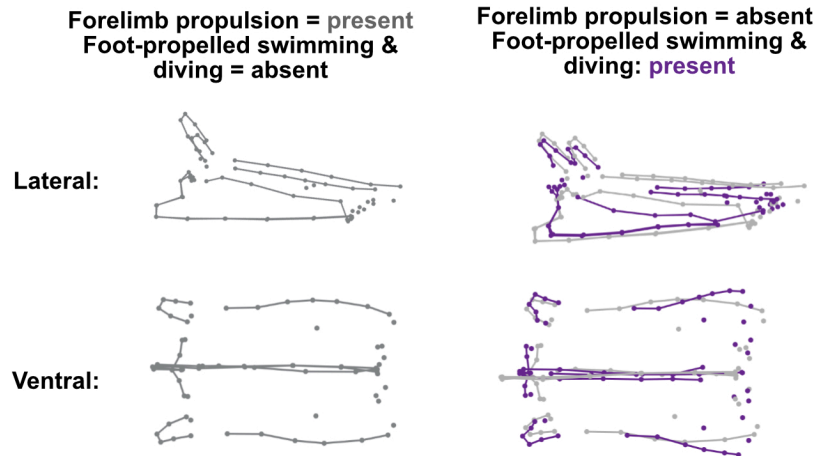

**Figure S6:** Shape deformations showing the independent effects of foot-propelled swimming and diving, with forelimb propulsion included for comparison. The light grey shape overlain on top of the coloured shapes represents the coloured shape occurring to the left in the series.

**Table S1:** Regression statistics for all remaining allometry regression models testing for allometry of sternum size. BM = body mass, size = sternum centroid size, FP = forelimb propulsion, AF = aerial flight, BF = burst flight, SO = soar, FPD = foot-propelled swimming/diving, WPD = wing-propelled diving, CURS = cursoriality, TERR = terrestriality, CF = continuous flapping.  $N = 105$  for all analyses.

| Models                                           | AICc    | AICc weights          | R <sup>2</sup> | Pagel's $\lambda$ | Variable  | Coefficient | Std Error | t-value | p-value |
|--------------------------------------------------|---------|-----------------------|----------------|-------------------|-----------|-------------|-----------|---------|---------|
| size ~ BM + BF                                   | -217.26 | $1.19 \times 10^{-6}$ | 0.89           | 0.68              | Intercept | 1.44        | 0.048     | 29.86   | 0       |
|                                                  |         |                       |                |                   | BM        | 0.99        | 0.033     | 30.57   | 0       |
|                                                  |         |                       |                |                   | BF        | 0.089       | 0.044     | 2.008   | 0.047   |
| size ~ BM + FP + AF + FPD + WPD + BF + SO + CURS | -208.10 | $1.2 \times 10^{-8}$  | 0.89           | 0.75              | Intercept | 1.32        | 0.052     | 25.53   | 0       |
|                                                  |         |                       |                |                   | BM        | 1.015       | 0.033     | 30.69   | 0       |
|                                                  |         |                       |                |                   | FP        | 0.20        | 0.054     | 3.70    | 0.0004  |
|                                                  |         |                       |                |                   | AF        | -0.077      | 0.05      | -1.53   | 0.13    |
|                                                  |         |                       |                |                   | FPD       | 0.03        | 0.024     | 1.26    | 0.21    |
|                                                  |         |                       |                |                   | WPD       | 0.015       | 0.034     | 0.42    | 0.67    |
|                                                  |         |                       |                |                   | BF        | 0.082       | 0.042     | 1.97    | 0.052   |
|                                                  |         |                       |                |                   | SO        | -0.0055     | 0.024     | -0.23   | 0.82    |
| CURS                                             | -0.002  | 0.019                 | -0.12          | 0.902             |           |             |           |         |         |
| size ~ BM + FP + AF + BF + SO + CURS + TERR + CF | -203.76 | $1.4 \times 10^{-9}$  | 0.89           | 0.78              | Intercept | 1.32        | 0.053     | 24.70   | 0       |
|                                                  |         |                       |                |                   | BM        | 1.023       | 0.035     | 29.14   | 0       |
|                                                  |         |                       |                |                   | FP        | 0.19        | 0.045     | 4.28    | 0       |
|                                                  |         |                       |                |                   | AF        | -0.077      | 0.044     | -1.75   | 0.083   |
|                                                  |         |                       |                |                   | BF        | 0.079       | 0.043     | 1.86    | 0.066   |
|                                                  |         |                       |                |                   | SO        | -0.0042     | 0.024     | -0.18   | 0.86    |
|                                                  |         |                       |                |                   | CURS      | -0.002      | 0.02      | -0.11   | 0.91    |
|                                                  |         |                       |                |                   | TERR      | -0.0016     | 0.015     | -0.11   | 0.91    |
| CF                                               | 0.0087  | 0.017                 | 0.51           | 0.61              |           |             |           |         |         |

|                                                                    |         |                       |      |      |           |        |        |        |        |
|--------------------------------------------------------------------|---------|-----------------------|------|------|-----------|--------|--------|--------|--------|
| size ~ BM + FP + AF +<br>FPD + WPD + BF + SO<br>+ CURS + TERR      | -199.15 | $1.4 \times 10^{-10}$ | 0.88 | 0.74 | Intercept | 1.32   | 0.052  | 25.403 | 0      |
|                                                                    |         |                       |      |      | BM        | 1.014  | 0.034  | 29.89  | 0      |
|                                                                    |         |                       |      |      | FP        | 0.2004 | 0.055  | 3.67   | 0.0004 |
|                                                                    |         |                       |      |      | AF        | -0.078 | 0.051  | -1.53  | 0.13   |
|                                                                    |         |                       |      |      | FPD       | 0.032  | 0.024  | 1.30   | 0.20   |
|                                                                    |         |                       |      |      | WPD       | 0.015  | 0.035  | 0.43   | 0.67   |
|                                                                    |         |                       |      |      | BF        | 0.082  | 0.042  | 1.97   | 0.052  |
|                                                                    |         |                       |      |      | SO        | -0.006 | 0.024  | -0.23  | 0.82   |
|                                                                    |         |                       |      |      | CURS      | -0.004 | 0.02   | -0.18  | 0.86   |
|                                                                    |         |                       |      |      | TERR      | 0.004  | 0.015  | 0.25   | 0.803  |
| size ~ BM + FP + AF +<br>FPD + WPD + BF + SO<br>+ CURS + TERR + CF | -190.50 | $1.8 \times 10^{-12}$ | 0.88 | 0.74 | Intercept | 1.31   | 0.053  | 24.71  | 0      |
|                                                                    |         |                       |      |      | BM        | 1.02   | 0.036  | 28.61  | 0      |
|                                                                    |         |                       |      |      | FP        | 0.20   | 0.055  | 3.61   | 0.0005 |
|                                                                    |         |                       |      |      | AF        | -0.081 | 0.052  | -1.55  | 0.12   |
|                                                                    |         |                       |      |      | FPD       | 0.031  | 0.025  | 1.24   | 0.22   |
|                                                                    |         |                       |      |      | WPD       | 0.015  | 0.035  | 0.44   | 0.66   |
|                                                                    |         |                       |      |      | BF        | 0.085  | 0.042  | 2.001  | 0.048  |
|                                                                    |         |                       |      |      | SO        | -0.003 | 0.026  | -0.11  | 0.91   |
|                                                                    |         |                       |      |      | CURS      | -0.003 | 0.0201 | -0.11  | 0.91   |
|                                                                    |         |                       |      |      | TERR      | 0.004  | 0.015  | 0.28   | 0.78   |
|                                                                    |         |                       |      | CF   | 0.007     | 0.017  | 0.39   | 0.70   |        |

**Table S2:** Regression statistics from linear regression between principal component (PC) axes and body mass

|                                 | <i>N</i> | Slope | 95% CI            | <i>p</i> | <i>P</i> from t-distr.  |
|---------------------------------|----------|-------|-------------------|----------|-------------------------|
| PC1 vs. log cube root body mass | 105      | 0.32  | -0.078 to -0.044  | 0        | $2.16 \times 10^{-10}$  |
| PC2 vs. log cube root body mass | 105      | -0.16 | -0.023 to -0.0058 | 0        | 0.001                   |
| PC3 vs. log cube root body mass | 105      | 0.049 | 0.03 to 0.035     | 0.17     | $< 2.2 \times 10^{-16}$ |
| PC4 vs. log cube root body mass | 105      | 0.037 | -0.011 to -0.007  | 0.23     | $1.047 \times 10^{-14}$ |

## **Supplementary Methods**

### ***Descriptions for landmarks (LM) and sliding semi-landmarks (SL) in order of placement***

#### **LM1**

Centre – The most anterior point of rostrum sterni. Sometimes this is confluent with the keel, sometimes it is separate.

#### **SL1**

Left – Side edge of rostrum sterni, landmarked from LM1 to LM2. Equivalent to SL2 on the right side.

#### **LM2**

Left – Corner between rostrum sterni and coracoid sulcus. Equivalent to LM3 on the right side.

#### **SL2**

Right – Side edge of rostrum sterni, landmarked from LM1 to LM3. Equivalent to SL1 on the left side.

#### **LM3**

Right – Corner between rostrum sterni and coracoid sulcus. Equivalent to LM2 on the left side.

#### **LM4**

Left – Most medial point of the left coracoid sulcus. Equivalent to LM6 on the right side.

#### **LM5**

Left – Most distal point of the left coracoid sulcus. Equivalent to LM7 on the right side.

#### **LM6**

Right – Most medial point of the right coracoid sulcus. Equivalent to LM4 on the left side.

#### **LM7**



Right – Most distal point of the right coracoid sulcus. Equivalent to LM5 on the left side.

### **LM8**

Left – Corner/inflection point between main sternum body and left craniolateral notch.  
Equivalent to LM9 on the right side.

### **SL3**

Left – Perimeter of left craniolateral process, landmarked from LM8 until LM10. Equivalent to SL4 on the right side.

### **LM9**

Right – Corner/inflection point between main sternum body and right craniolateral notch.  
Equivalent to LM8 on the left side.

### **SL4**

Right – Perimeter of right craniolateral process, landmarked from LM9 until LM12. Equivalent to SL3 on the left side.

### **LM10**

Left – Anterior of anterior-most rib facet on the left side. Equivalent to LM12 on the right side.

### **LM11**

Left – Posterior of posterior-most rib facet on the left side. Equivalent to LM13 on the right side.

### **LM12**

Right – Anterior of anterior-most rib facet on the right side. Equivalent to LM10 on the left side.

### **LM13**

Right – Posterior of posterior-most rib facet on the right side. Equivalent to LM11 on the left side.

#### **SL5**

Left – Lateral edge of sternum, landmarked from L11 to LM15. Equivalent to SL6 on right side.

#### **SL6**

Right – Lateral edge of sternum, landmarked from L13 to LM22. Equivalent to SL5 on left side.

#### **LM14**

Centre – Midpoint of sternum on posterior edge in ventral view.

#### **LM15**

Left – Caudolateral distal corner of sternum, or of lateral trabecula when present. Equivalent to L22 on right side.

#### **LM16**

Left – Medial corner of lateral trabecula when present. If a lateral trabecula is absent, place a series of semi-landmarks between the last landmark that was placed (eg. LM15) and LM14 and skip the remaining landmarks of the posterior border on the left side (LM17-21), as they are later estimated as equidistant midpoints derived from this semi-landmark series. If a fenestra is present, it should be treated as a lateral trabecula that has fused; this landmark should be placed along the posterior border directly posterior to the midpoint of the fenestra. Equivalent to LM23 on the right side.

#### **LM17**

Left – Most anterior point of the most distal sternal notch (if two notches are present; if only one notch is present, this landmark denotes it). If this notch is absent, place a series of semi-landmarks between the last landmark that was placed and LM14, and skip the remaining landmarks of the posterior border on the left side (LM18-21), as they are later estimated as equidistant midpoints derived from this semi-landmark series. If a fenestra is present, it should

be treated as a lateral trabecula that has fused; this landmark should be placed on the most anterior point of the fenestra. Equivalent to LM24 on the right side.

### **LM18**

Left – Distal corner of intermediate trabecula or central sternum body (xiphoid process). If an intermediate trabecula is absent, place LM18 on the distal corner of the xiphoid process, place a series of semi-landmarks between LM18 and LM14, and skip the remaining landmarks of the posterior border on the left side (LM19-21), as they are later estimated as equidistant midpoints derived from this semi-landmark series. If a fenestra is present, it should be treated as an intermediate trabecula that has fused; this landmark should be placed along the posterior border directly posterior to the midpoint of the fenestra (in the same spot as the most recent landmark placed on the posterior border, LM16). Equivalent to LM25 on the right side.

### **LM19**

Left – Medial corner of intermediate trabecula. If an intermediate trabecula is absent, place a series of semi-landmarks between the last landmark that was placed and LM14, skip the remaining landmarks of the posterior border on the left side (LM20-21), as they are later estimated as equidistant midpoints derived from this semi-landmark series. If a fenestra is present, it should be treated as an intermediate trabecula that has fused; this landmark should be placed along the posterior border directly posterior to the midpoint of the fenestra. Equivalent to LM26 on the right side.

### **LM20**

Left – Most anterior point of medial sternum notch, if two notches are present. If this notch is absent, place a series of semi-landmarks between the last landmark that was placed and LM14, skip the remaining landmarks of the posterior border on the left side (L21) as they are later estimated as equidistant midpoints derived from this semi-landmark series. If a fenestra is present, it should be treated as an intermediate trabecula that has fused; this landmark should be placed on the most anterior point of the fenestra. Equivalent to LM27 on the right side.

### **LM21**

Left – Distal corner of xiphoid process. If this point does not exist on the posterior border (eg. the sternum does not have both a lateral trabecula and an intermediate trabecula), place a series of semi-landmarks between the last landmark that was placed and LM14, skip this landmark, as it will later be estimated as the equidistant midpoint derived from this semi-landmark series. If a fenestra is present, it should be treated as an intermediate trabecula that has fused; this landmark should be placed along the posterior border directly posterior to the midpoint of the fenestra (in the same spot as the most recent landmark placed on the posterior border, LM19). Equivalent to LM28 on the right side.

### **LM22**

Right – Caudolateral distal corner of sternum, or of lateral trabecula, when present. Equivalent to L15 on left side.

### **LM23**

Right – Medial corner of lateral trabecula when present. If a lateral trabecula is absent, place a series of semi-landmarks between the last landmark that was placed (eg. LM22) and LM14 and skip the remaining landmarks of the posterior border on the right side (LM24-28), as they are later estimated as equidistant midpoints derived from this semi-landmark series. If a fenestra is present, it should be treated as a lateral trabecula that has fused; this landmark should be placed along the posterior border directly posterior to the midpoint of the fenestra. Equivalent to LM16 on the left side.

### **LM24**

Right – Most anterior point of the most distal sternal notch (if two notches are present; if only one notch is present, this landmark denotes it). If this notch is absent, place a series of semi-landmarks between the last landmark that was placed and LM14, and skip the remaining landmarks of the posterior border on the right side (LM25-28), as they are later estimated as equidistant midpoints derived from this semi-landmark series. If a fenestra is present, it should be treated as a lateral trabecula that has fused; this landmark should be placed on the most anterior point of the fenestra. Equivalent to LM17 on the left side.

### **LM25**

Right – Distal corner of intermediate trabecula or central sternum body (xiphoid process). If an intermediate trabecula is absent, place LM25 on the distal corner of the xiphoid process, place a series of semi-landmarks between the last landmark that was placed and LM14, and skip the remaining landmarks of the posterior border on the right side (LM26-28), as they are later estimated as equidistant midpoints derived from this semi-landmark series. If a fenestra is present, it should be treated as an intermediate trabecula that has fused; this landmark should be placed along the posterior border directly posterior to the midpoint of the fenestra (in the same spot as the most recent landmark placed on the posterior border, LM23). Equivalent to LM18 on the left side.

### **LM26**

Right – Medial corner of intermediate trabecula. If an intermediate trabecula is absent, place a series of semi-landmarks between the last landmark that was placed and LM14, skip the remaining landmarks of the posterior border on the right side (LM27-28), as they are later estimated as equidistant midpoints derived from this semi-landmark series. If a fenestra is present, it should be treated as an intermediate trabecula that has fused; this landmark should be placed along the posterior border directly posterior to the midpoint of the fenestra. Equivalent to LM19 on the left side.

### **LM27**

Right – Most anterior point of medial sternum notch, if two notches are present. If this notch is absent, place a series of semi-landmarks between the last landmark that was placed and LM14, skip the remaining landmarks of the posterior border on the right side (L28) as they are later estimated as equidistant midpoints derived from this semi-landmark series. If a fenestra is present, it should be treated as an intermediate trabecula that has fused; this landmark should be placed on the most anterior point of the fenestra. Equivalent to LM20 on the left side.

### **LM28**

Right – Distal corner of xiphoid process. If this point does not exist on the posterior border (eg. the sternum does not have both a lateral trabecula and an intermediate trabecula), place a series

of semi-landmarks between the last landmark that was placed and LM14, skip this landmark, as it will later be estimated as the equidistant midpoint derived from this semi-landmark series. If a fenestra is present, it should be treated as an intermediate trabecula that has fused; this landmark should be placed along the posterior border directly posterior to the midpoint of the fenestra (in the same spot as the most recent landmark placed on the posterior border, LM26). Equivalent to LM21 on the left side.

### **LM29**

Left – Most posterior corner of sternal keel. Equivalent to LM30 on the right side.

### **SL7**

Left – Perimeter of sternal keel, landmarked from LM29 to LM1. Equivalent to SL8 on right side.

### **LM30**

Right – Most posterior corner of sternal keel. Equivalent to LM29 on the left side.

### **SL8**

Right – Perimeter of sternal keel, landmarked from LM30 to LM1. Equivalent to SL7 on left side.

### **LM31**

Centre – Midpoint of sternum on posterior edge in dorsal view.

### **SL9**

Centre – Dorsal midline, landmarked from LM31 to LM32.

### **LM32**

Centre – Dorsal midpoint, just before dorsal surface slopes anterodorsally.

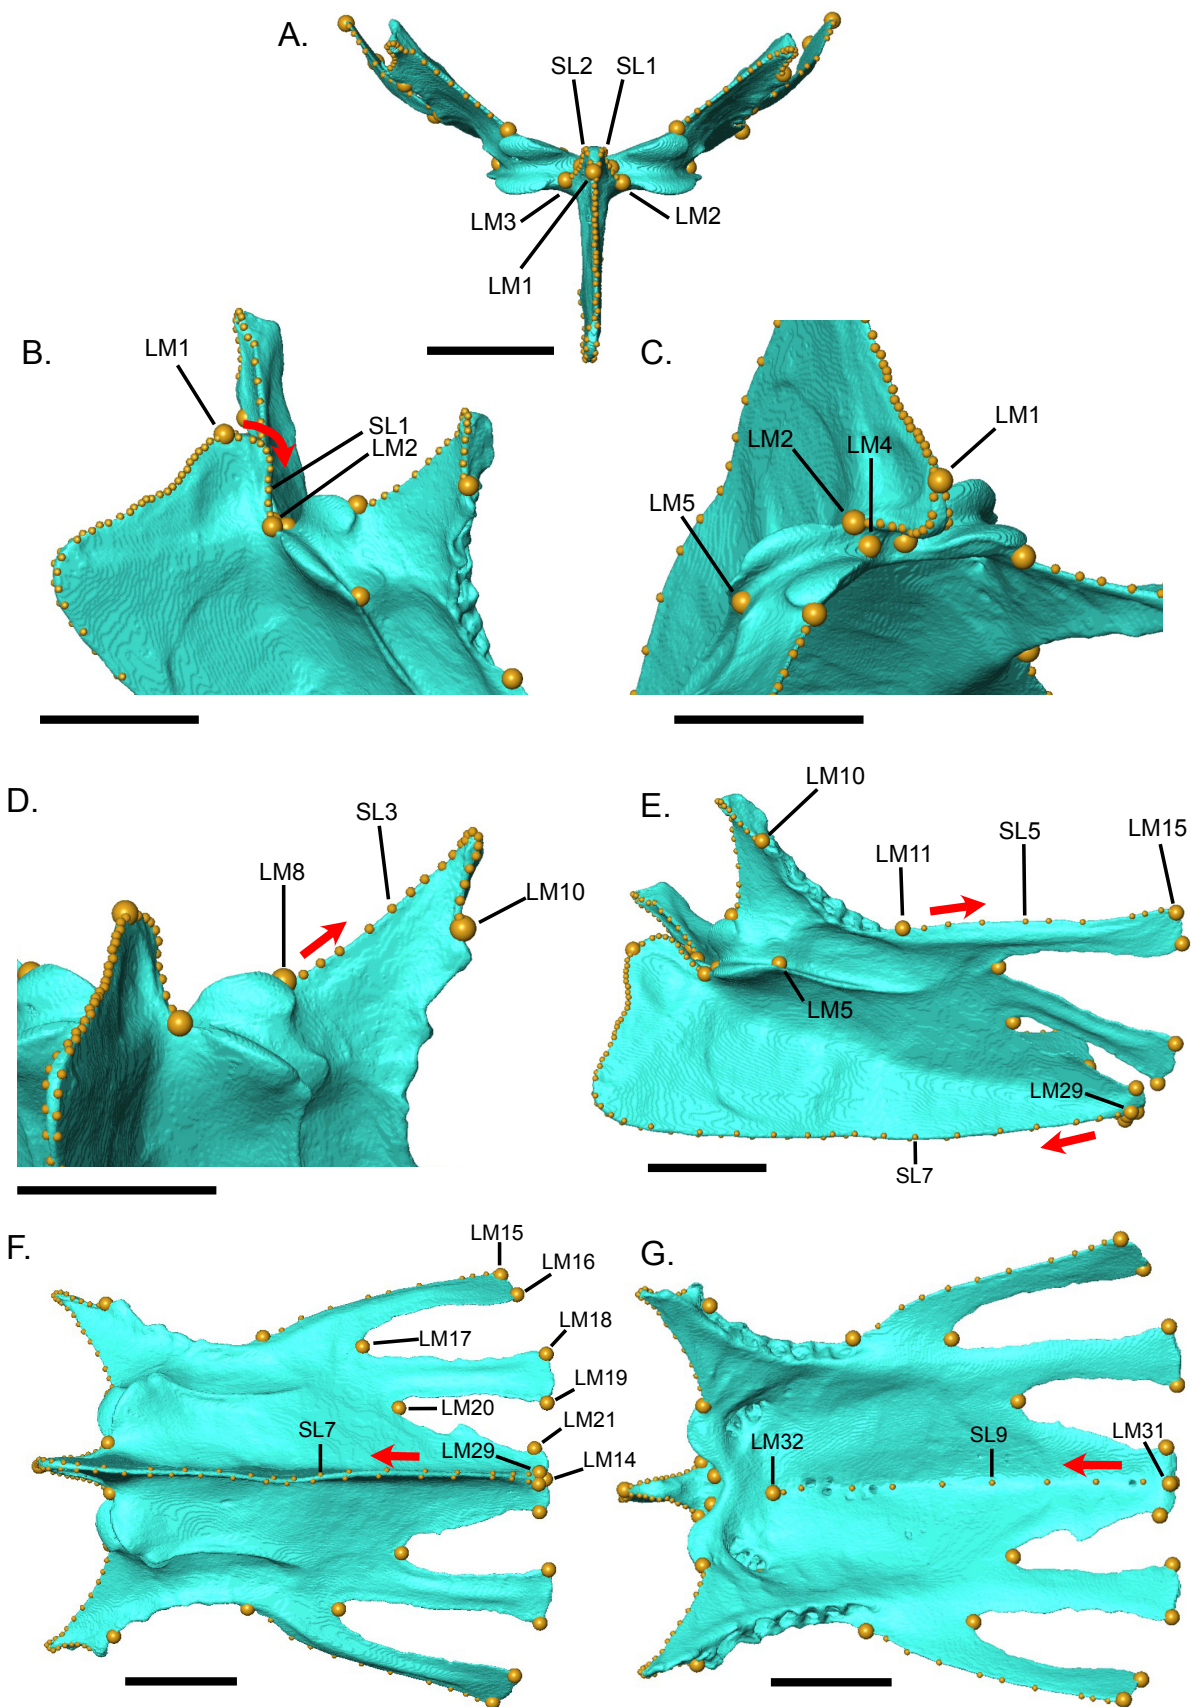

**Figure S7:** Sternum landmarks (LM) and semi-landmark (SL) series shown on the sternum of *Ramphastos ambiguus* (NHMUK S2002.21.2). LM are noted by the larger yellow spheres, and SL by the smaller yellow spheres. Red arrows indicate the direction in which the semilandmarks are placed. A. Sternum in anterior view. LM1-3 and SL1-2 are shown. B. Anterior half of sternum shown in lateral view. LM1-2 and SL1 are shown. C. Anterior half sternum shown in dorsolateral view to focus on coracoid sulcus. LM1-5 are shown. D. Anterior half sternum shown in ventrolateral view to focus on the craniolateral process. LM8, 10 and SL3 are shown. E. Sternum in left lateral view. LM5, 10, 11, 15, 29, and SL5 and 7 are shown. F. Sternum in ventral view. LM14-21, 29 and SL7 are shown. G. Sternum in dorsal view. LM31-32 and SL9 are shown. Landmarks which occur on both the left and right side (labelled 'Left' or 'Right' in the description above) are labelled only on the left side, except in A. Equivalent landmarks on the right side are described above. Scale bars: 10 mm.

Simplified flight styles in BM\_flightsimp.csv: BF = burst flight; CF = continuous flapping; FG = flap-gliding; FL = flightless; PF = poor flight; SO = soaring; WD = wing-propelled diving
